# Supplementary material for: Evolution of Female Preference for Younger Males
Source: PubMed Central journal article supplement (PMC1976549; doi:10.1371/journal.pone.0000939), 2007-09-26
Supplement: pone.0000939.s004.pdf [file pone.0000939.s004.pdf]

Table S1. Partial correlations between female preference and relative gamete mutation load or relative somatic quality for different maximum mutation probabilities and mutation effect sizes

| Effect size | Number of loci | Relative gamete mutation load |            |           | Relative somatic quality |            |           |
|-------------|----------------|-------------------------------|------------|-----------|--------------------------|------------|-----------|
|             |                | max = 0.01                    | max = 0.05 | max = 0.1 | max = 0.01               | max = 0.05 | max = 0.1 |
| Large       | 5              | 0.06                          | -0.15      | -0.30**   | 0.23*                    | -0.46***   | -0.31**   |
| Large       | 10             | 0.10                          | -0.25*     | -0.38**   | 0.26*                    | -0.36**    | -0.37**   |
| Small       | 20             | -0.27*                        | -0.27*     | -0.32**   | 0.29*                    | -0.32**    | -0.33**   |
| Small       | 40             | -0.08                         | -0.20      | -0.13     | 0.25*                    | -0.20      | -0.41***  |

\*P<0.05, \*\*P<0.01, \*\*\*P<0.001
